# Supplementary material for: Novel photofunctional hybrid materials (alumina and titania) functionalized with both MOF and lanthanide complexes through coordination bonds
Source: Royal Society of Chemistry journal article supplement (doi:10.1039/c4ra05704j), 2014-01-01
Supplement: c4ra05704j1.pdf [file c4ra05704j1.pdf]

## Electronically Supporting Information

### Novel photofunctional hybrid materials (alumina and titania) functionalized with both MOF and lanthanide complexes through coordination bonds

X. Y. Xu, B. Yan\*

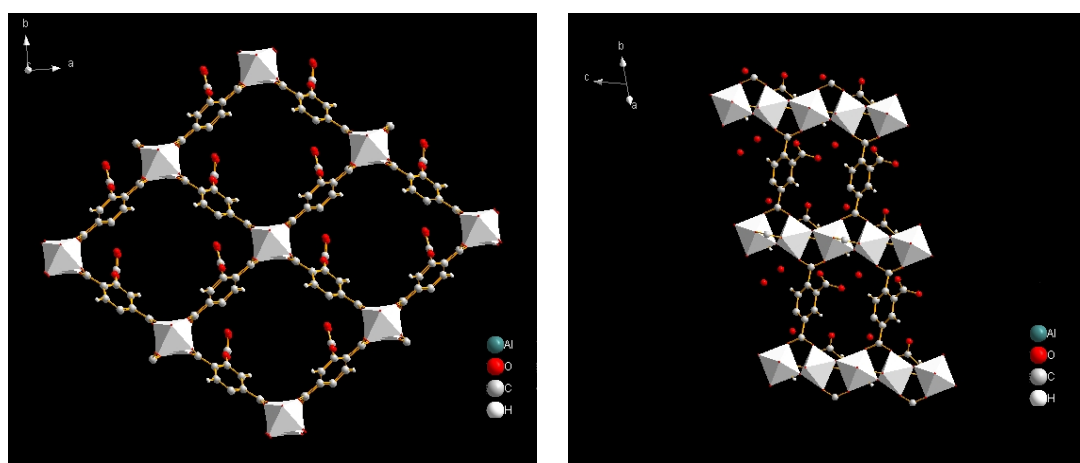

**Figure S1** Structural representations of Al-MIL-53-COOH (MOF), whose  $\text{AlO}_6$ -octahedra are presented in white.

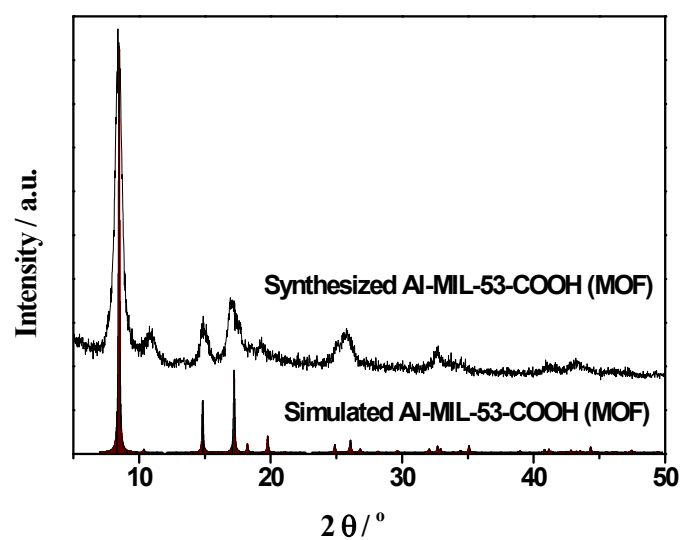

**Figure S2** X-ray diffraction pattern of Al-MIL-53-COOH (MOF) and its simulated XRD pattern

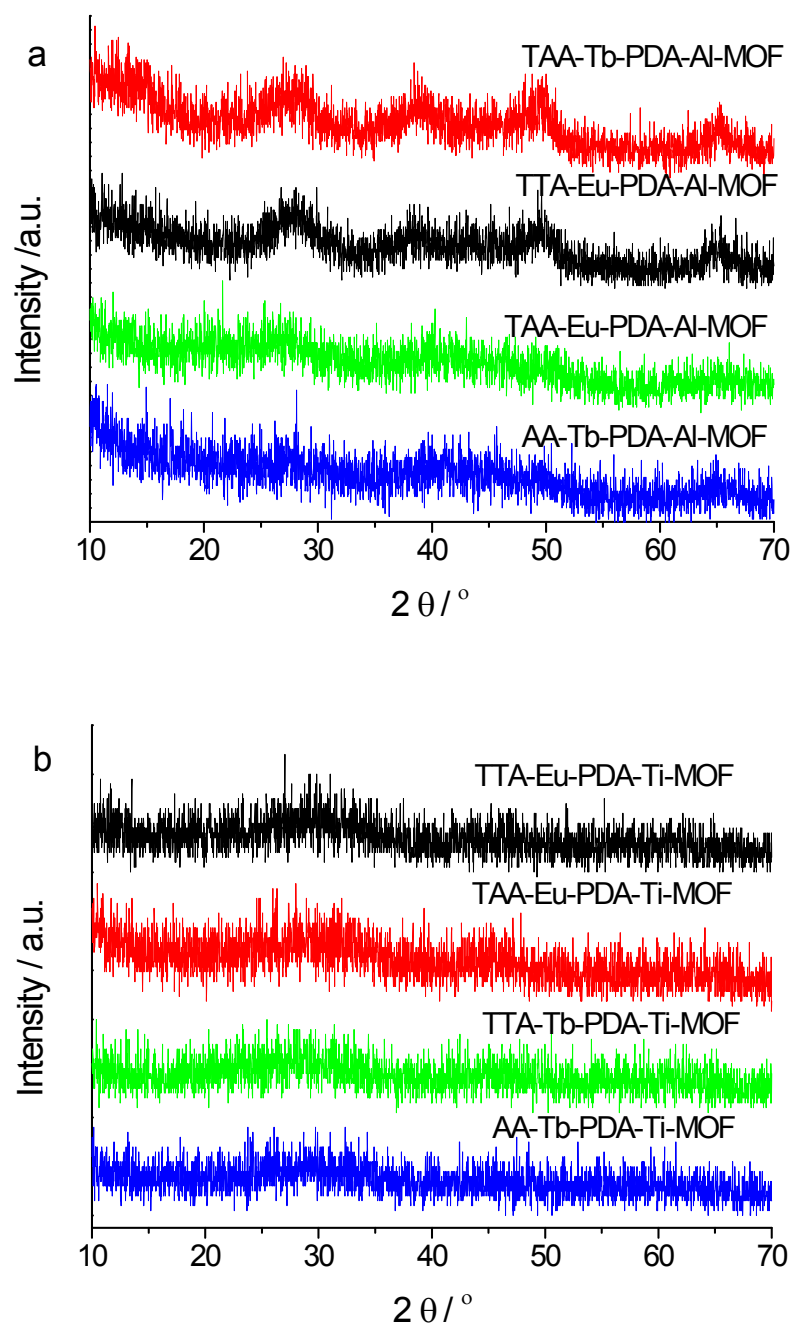

**Figure S3** X-ray diffraction pattern of hybrid materials L-Eu/Tb-PDA-Al/Ti-MOF: (a) alumina system; (b) titania system ( $\text{Eu}^{3+}$ , L = TTA, TAA;  $\text{Tb}^{3+}$ , L = TAA, AA)

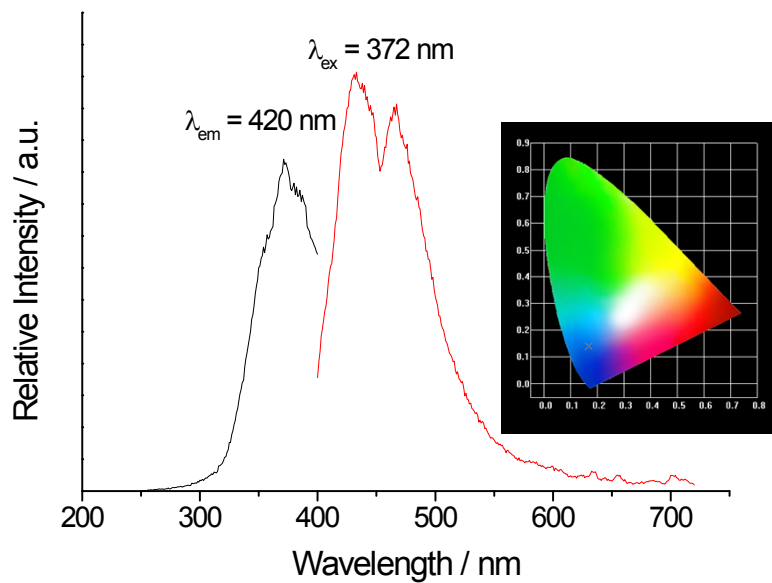

**Figure S4** The excitation and emission spectra and the CIE chromaticity diagram of MOF (Al-MIL-53-COOH)

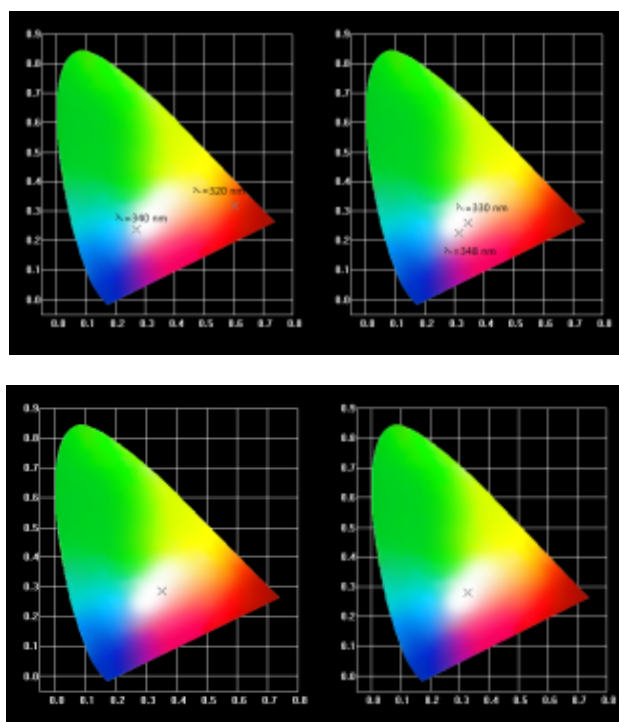

**Figure S5** The CIE chromaticity diagrams of the hybrids TAA-Eu-PDA-Al-MOF (a), TTA-Eu-PDA-Al-MOF (b), TTA-Eu-PDA-Ti-MOF (c) and TAA-Eu-PDA-Ti-MOF (d).

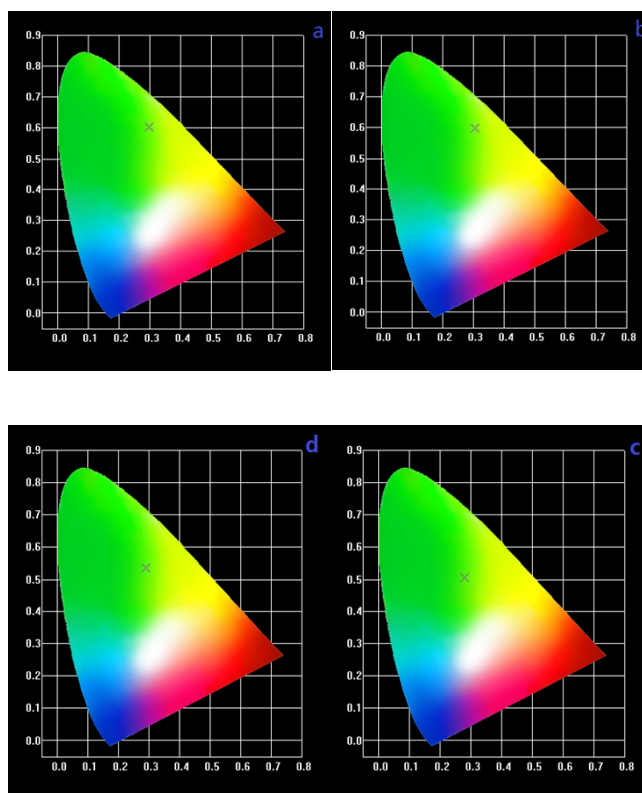

**Figure S6** The CIE chromaticity diagram of TAA-Tb-PDA-Al-MOF (a), AA-Tb-PDA-Al-MOF (b), TAA-Tb-PDA-Ti-MOF (c) and AA-Tb-PDA-Ti-MOF (d).

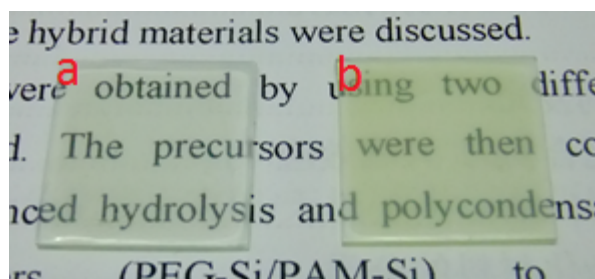

**Figure S7** The pictures of hybrid films fabricated with TTA-Eu-PDA-Ti-MOF (a) and TTA-Eu-PDA-Ti-MOF (b)

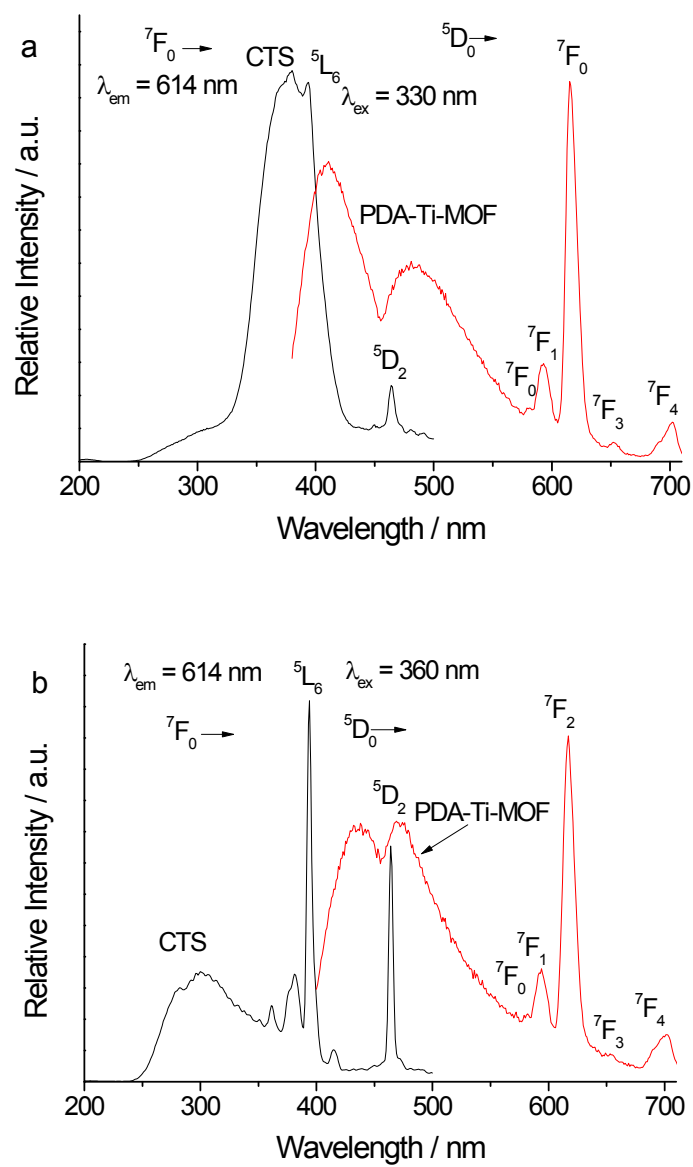

**Figure S8** The excitation and emission spectra of hybrid films fabricated with TTA-Eu-PDA-Ti-MOF (a) and TAA-Eu-PDA-Ti-MOF (b).
